# Supplementary material
Source: PubMed Central journal article supplement (PMC6879360)
Supplement: plantbiotechnology-35-3-18.0502a-s001.pdf [file plantbiotechnology-35-3-18.0502a-s001.pdf]

Supplementary Table S1. Correlations among studied traits in barley landraces at tillering stage

|                       | Carbohydrates        | Proline              | MDA                  | Na <sup>+</sup>      | K <sup>+</sup>       | Ca <sup>2+</sup>     | Mg <sup>2+</sup>     | Fe <sup>2+</sup>     | Zn <sup>2+</sup>     | Mn <sup>2+</sup>     | Ash content         | $\Delta^{13}\text{C}$ | Grain yield         | WUE <sub>gy</sub> |
|-----------------------|----------------------|----------------------|----------------------|----------------------|----------------------|----------------------|----------------------|----------------------|----------------------|----------------------|---------------------|-----------------------|---------------------|-------------------|
| Carbohydrates         | 1                    |                      |                      |                      |                      |                      |                      |                      |                      |                      |                     |                       |                     |                   |
| Proline               | 0.719 <sup>ns</sup>  | 1                    |                      |                      |                      |                      |                      |                      |                      |                      |                     |                       |                     |                   |
| MDA                   | -0.968 <sup>ns</sup> | -0.871 <sup>ns</sup> | 1                    |                      |                      |                      |                      |                      |                      |                      |                     |                       |                     |                   |
| Na <sup>+</sup>       | 0.996 <sup>ns</sup>  | 0.654 <sup>ns</sup>  | -0.941 <sup>ns</sup> | 1                    |                      |                      |                      |                      |                      |                      |                     |                       |                     |                   |
| K <sup>+</sup>        | 0.938 <sup>ns</sup>  | 0.916 <sup>ns</sup>  | -0.995 <sup>ns</sup> | 0.903 <sup>ns</sup>  | 1                    |                      |                      |                      |                      |                      |                     |                       |                     |                   |
| Ca <sup>2+</sup>      | 0.995 <sup>ns</sup>  | 0.649 <sup>ns</sup>  | -0.939 <sup>ns</sup> | 1 **                 | 0.900 <sup>ns</sup>  | 1                    |                      |                      |                      |                      |                     |                       |                     |                   |
| Mg <sup>2+</sup>      | 0.992 <sup>ns</sup>  | 0.800 <sup>ns</sup>  | -0.992 <sup>ns</sup> | 0.977 <sup>ns</sup>  | 0.974 <sup>ns</sup>  | 0.976 <sup>ns</sup>  | 1                    |                      |                      |                      |                     |                       |                     |                   |
| Fe <sup>2+</sup>      | 0.568 <sup>ns</sup>  | -0.164 <sup>ns</sup> | -0.342 <sup>ns</sup> | 0.639 <sup>ns</sup>  | 0.246 <sup>ns</sup>  | 0.644 <sup>ns</sup>  | 0.460 <sup>ns</sup>  | 1                    |                      |                      |                     |                       |                     |                   |
| Zn <sup>2+</sup>      | 0.940 <sup>ns</sup>  | 0.437 <sup>ns</sup>  | -0.823 <sup>ns</sup> | 0.966 <sup>ns</sup>  | 0.762 <sup>ns</sup>  | 0.968 <sup>ns</sup>  | 0.889 <sup>ns</sup>  | 0.815 <sup>ns</sup>  | 1                    |                      |                     |                       |                     |                   |
| Mn <sup>2+</sup>      | 0.752 <sup>ns</sup>  | 0.081 <sup>ns</sup>  | -0.561 <sup>ns</sup> | 0.807 <sup>ns</sup>  | 0.475 <sup>ns</sup>  | 0.811 <sup>ns</sup>  | 0.663 <sup>ns</sup>  | 0.970 <sup>ns</sup>  | 0.932 <sup>ns</sup>  | 1                    |                     |                       |                     |                   |
| Ash content           | -0.914 <sup>ns</sup> | -0.939 <sup>ns</sup> | 0.987 <sup>ns</sup>  | -0.874 <sup>ns</sup> | -0.998 *             | -0.871 <sup>ns</sup> | -0.958 <sup>ns</sup> | -0.185 <sup>ns</sup> | -0.720 <sup>ns</sup> | -0.419 <sup>ns</sup> | 1                   |                       |                     |                   |
| $\Delta^{13}\text{C}$ | -0.068 <sup>ns</sup> | -0.743 <sup>ns</sup> | 0.317 <sup>ns</sup>  | 0.021 <sup>ns</sup>  | -0.411 <sup>ns</sup> | 0.027 <sup>ns</sup>  | -0.192 <sup>ns</sup> | 0.782 <sup>ns</sup>  | 0.278 <sup>ns</sup>  | 0.607 <sup>ns</sup>  | 0.467 <sup>ns</sup> | 1                     |                     |                   |
| Grain yield           | -0.920 <sup>ns</sup> | -0.933 <sup>ns</sup> | 0.989 <sup>ns</sup>  | -0.882 <sup>ns</sup> | -0.999 *             | -0.879 <sup>ns</sup> | -0.962 <sup>ns</sup> | -0.201 <sup>ns</sup> | -0.731 <sup>ns</sup> | -0.434 <sup>ns</sup> | 1 *                 | 0.999 *               | 1                   |                   |
| WUE <sub>gy</sub>     | -0.547 <sup>ns</sup> | -0.975 <sup>ns</sup> | 0.740 <sup>ns</sup>  | -0.470 <sup>ns</sup> | -0.804 <sup>ns</sup> | -0.465 <sup>ns</sup> | -0.648 <sup>ns</sup> | 0.378 <sup>ns</sup>  | -0.227 <sup>ns</sup> | 0.141 <sup>ns</sup>  | 0.840 <sup>ns</sup> | 0.872 <sup>ns</sup>   | 0.831 <sup>ns</sup> | 1                 |

ns, (\*), (\*\*) are non-significant or significant at  $P < 0.05$  or  $P < 0.01$ , respectively.

Supplementary Table S2. Correlations among studied traits in barley landraces at heading stage

|                   | Carbohydrates        | Proline              | MDA                  | Na <sup>+</sup>      | K <sup>+</sup>       | Ca <sup>2+</sup>     | Mg <sup>2+</sup>     | Fe <sup>2+</sup>     | Zn <sup>2+</sup>     | Mn <sup>2+</sup>     | Ash content         | Δ <sup>13</sup> C   | Grain yield         | WUE <sub>gy</sub> |
|-------------------|----------------------|----------------------|----------------------|----------------------|----------------------|----------------------|----------------------|----------------------|----------------------|----------------------|---------------------|---------------------|---------------------|-------------------|
| Carbohydrates     | 1                    |                      |                      |                      |                      |                      |                      |                      |                      |                      |                     |                     |                     |                   |
| Proline           | 0.932 <sup>ns</sup>  | 1                    |                      |                      |                      |                      |                      |                      |                      |                      |                     |                     |                     |                   |
| MDA               | -0.775 <sup>ns</sup> | -0.951 <sup>ns</sup> | 1                    |                      |                      |                      |                      |                      |                      |                      |                     |                     |                     |                   |
| Na <sup>+</sup>   | -0.400 <sup>ns</sup> | -0.042 <sup>ns</sup> | -0.269 <sup>ns</sup> | 1                    |                      |                      |                      |                      |                      |                      |                     |                     |                     |                   |
| K <sup>+</sup>    | -0.999 <sup>*</sup>  | -0.948 <sup>ns</sup> | 0.804 <sup>ns</sup>  | 0.356 <sup>ns</sup>  | 1                    |                      |                      |                      |                      |                      |                     |                     |                     |                   |
| Ca <sup>2+</sup>  | -0.366 <sup>ns</sup> | -0.678 <sup>ns</sup> | 0.872 <sup>ns</sup>  | -0.707 <sup>ns</sup> | 0.409 <sup>ns</sup>  | 1                    |                      |                      |                      |                      |                     |                     |                     |                   |
| Mg <sup>2+</sup>  | -0.751 <sup>ns</sup> | -0.462 <sup>ns</sup> | 0.165 <sup>ns</sup>  | 0.905 <sup>ns</sup>  | 0.719 <sup>ns</sup>  | -0.339 <sup>ns</sup> | 1                    |                      |                      |                      |                     |                     |                     |                   |
| Fe <sup>2+</sup>  | -0.978 <sup>ns</sup> | -0.836 <sup>ns</sup> | 0.626 <sup>ns</sup>  | 0.583 <sup>ns</sup>  | 0.967 <sup>ns</sup>  | 0.164 <sup>ns</sup>  | 0.872 <sup>ns</sup>  | 1                    |                      |                      |                     |                     |                     |                   |
| Zn <sup>2+</sup>  | 0.970 <sup>ns</sup>  | 0.993 <sup>ns</sup>  | -0.906 <sup>ns</sup> | -0.163 <sup>ns</sup> | -0.980 <sup>ns</sup> | -0.583 <sup>ns</sup> | -0.566 <sup>ns</sup> | -0.897 <sup>ns</sup> | 1                    |                      |                     |                     |                     |                   |
| Mn <sup>2+</sup>  | 0.078 <sup>ns</sup>  | -0.288 <sup>ns</sup> | 0.569 <sup>ns</sup>  | -0.945 <sup>ns</sup> | -0.031 <sup>ns</sup> | 0.899 <sup>ns</sup>  | -0.717 <sup>ns</sup> | -0.285 <sup>ns</sup> | -0.169 <sup>ns</sup> | 1                    |                     |                     |                     |                   |
| Ash content       | -0.991 <sup>ns</sup> | -0.876 <sup>ns</sup> | 0.684 <sup>ns</sup>  | 0.519 <sup>ns</sup>  | 0.984 <sup>ns</sup>  | 0.238 <sup>ns</sup>  | 0.833 <sup>ns</sup>  | 0.997 <sup>*</sup>   | -0.928 <sup>ns</sup> | -0.211 <sup>ns</sup> | 1                   |                     |                     |                   |
| Δ <sup>13</sup> C | -0.947 <sup>ns</sup> | -0.999 <sup>*</sup>  | 0.937 <sup>ns</sup>  | 0.084 <sup>ns</sup>  | 0.961 <sup>ns</sup>  | 0.646 <sup>ns</sup>  | 0.499 <sup>ns</sup>  | 0.859 <sup>ns</sup>  | -0.997 <sup>ns</sup> | 0.247 <sup>ns</sup>  | 0.895 <sup>ns</sup> | 1                   |                     |                   |
| Grain yield       | -0.998 <sup>*</sup>  | -0.956 <sup>ns</sup> | 0.818 <sup>ns</sup>  | 0.334 <sup>ns</sup>  | 1 <sup>*</sup>       | 0.431 <sup>ns</sup>  | 0.703 <sup>ns</sup>  | 0.961 <sup>ns</sup>  | -0.984 <sup>ns</sup> | -0.007 <sup>ns</sup> | 0.979 <sup>ns</sup> | 0.998 <sup>*</sup>  | 1                   |                   |
| WUE <sub>gy</sub> | -0.868 <sup>ns</sup> | -0.630 <sup>ns</sup> | 0.359 <sup>ns</sup>  | 0.802 <sup>ns</sup>  | 0.844 <sup>ns</sup>  | -0.144 <sup>ns</sup> | 0.980 <sup>ns</sup>  | 0.953 <sup>ns</sup>  | -0.720 <sup>ns</sup> | -0.563 <sup>ns</sup> | 0.927 <sup>ns</sup> | 0.662 <sup>ns</sup> | 0.831 <sup>ns</sup> | 1                 |

ns, (\*) are non-significant or significant at  $P < 0.05$ , respectively.

Supplementary Table S3. Correlations among studied traits in barley landraces at grain filling stage

|                   | Carbohydrates        | Proline              | MDA                  | Na <sup>+</sup>      | K <sup>+</sup>       | Ca <sup>2+</sup>     | Mg <sup>2+</sup>     | Fe <sup>2+</sup>     | Zn <sup>2+</sup>     | Mn <sup>2+</sup>    | Ash content         | Δ <sup>13</sup> C   | Grain yield         | WUE <sub>gy</sub> |
|-------------------|----------------------|----------------------|----------------------|----------------------|----------------------|----------------------|----------------------|----------------------|----------------------|---------------------|---------------------|---------------------|---------------------|-------------------|
| Carbohydrates     | 1                    |                      |                      |                      |                      |                      |                      |                      |                      |                     |                     |                     |                     |                   |
| Proline           | -0.815 <sup>ns</sup> | 1                    |                      |                      |                      |                      |                      |                      |                      |                     |                     |                     |                     |                   |
| MDA               | 1 **                 | -0.823 <sup>ns</sup> | 1                    |                      |                      |                      |                      |                      |                      |                     |                     |                     |                     |                   |
| Na <sup>+</sup>   | -0.568 <sup>ns</sup> | 0.940 <sup>ns</sup>  | -0.580 <sup>ns</sup> | 1                    |                      |                      |                      |                      |                      |                     |                     |                     |                     |                   |
| K <sup>+</sup>    | 0.952 <sup>ns</sup>  | -0.598 <sup>ns</sup> | 0.947 <sup>ns</sup>  | -0.288 <sup>ns</sup> | 1                    |                      |                      |                      |                      |                     |                     |                     |                     |                   |
| Ca <sup>2+</sup>  | 0.720 <sup>ns</sup>  | -0.184 <sup>ns</sup> | 0.710 <sup>ns</sup>  | 0.163 <sup>ns</sup>  | 0.898 <sup>ns</sup>  | 1                    |                      |                      |                      |                     |                     |                     |                     |                   |
| Mg <sup>2+</sup>  | 0.426 <sup>ns</sup>  | 0.178 <sup>ns</sup>  | 0.412 <sup>ns</sup>  | 0.503 <sup>ns</sup>  | 0.683 <sup>ns</sup>  | 0.934 <sup>ns</sup>  | 1                    |                      |                      |                     |                     |                     |                     |                   |
| Fe <sup>2+</sup>  | -1 *                 | 0.797 <sup>ns</sup>  | -0.999 *             | 0.543 <sup>ns</sup>  | -0.960 <sup>ns</sup> | -0.740 <sup>ns</sup> | -0.452 <sup>ns</sup> | 1                    |                      |                     |                     |                     |                     |                   |
| Zn <sup>2+</sup>  | 0.925 <sup>ns</sup>  | -0.974 <sup>ns</sup> | 0.931 <sup>ns</sup>  | -0.837 <sup>ns</sup> | 0.765 <sup>ns</sup>  | 0.403 <sup>ns</sup>  | 0.051 <sup>ns</sup>  | -0.914 <sup>ns</sup> | 1                    |                     |                     |                     |                     |                   |
| Mn <sup>2+</sup>  | -0.946 <sup>ns</sup> | 0.959 <sup>ns</sup>  | -0.951 <sup>ns</sup> | 0.804 <sup>ns</sup>  | -0.801 <sup>ns</sup> | -0.456 <sup>ns</sup> | -0.109 <sup>ns</sup> | 0.936 <sup>ns</sup>  | -0.998 *             | 1                   |                     |                     |                     |                   |
| Ash content       | -0.993 <sup>ns</sup> | 0.876 <sup>ns</sup>  | -0.995 <sup>ns</sup> | 0.658 <sup>ns</sup>  | -0.911 <sup>ns</sup> | -0.636 <sup>ns</sup> | -0.319 <sup>ns</sup> | 0.990 <sup>ns</sup>  | -0.963 <sup>ns</sup> | 0.977 <sup>ns</sup> | 1                   |                     |                     |                   |
| Δ <sup>13</sup> C | -0.988 <sup>ns</sup> | 0.714 <sup>ns</sup>  | -0.985 <sup>ns</sup> | 0.432 <sup>ns</sup>  | -0.988 <sup>ns</sup> | -0.819 <sup>ns</sup> | -0.561 <sup>ns</sup> | 0.992 <sup>ns</sup>  | -0.855 <sup>ns</sup> | 0.884 <sup>ns</sup> | 0.963 <sup>ns</sup> | 1                   |                     |                   |
| Grain yield       | -0.994 <sup>ns</sup> | 0.746 <sup>ns</sup>  | -0.992 <sup>ns</sup> | 0.474 <sup>ns</sup>  | -0.980 <sup>ns</sup> | -0.792 <sup>ns</sup> | -0.522 <sup>ns</sup> | 0.997 <sup>ns</sup>  | -0.878 <sup>ns</sup> | 0.905 <sup>ns</sup> | 0.975 <sup>ns</sup> | 0.999 *             | 1                   |                   |
| WUE <sub>gy</sub> | -0.765 <sup>ns</sup> | 0.250 <sup>ns</sup>  | -0.755 <sup>ns</sup> | -0.096 <sup>ns</sup> | -0.926 <sup>ns</sup> | -0.998 *             | -0.908 <sup>ns</sup> | 0.784 <sup>ns</sup>  | -0.464 <sup>ns</sup> | 0.515 <sup>ns</sup> | 0.686 <sup>ns</sup> | 0.856 <sup>ns</sup> | 0.831 <sup>ns</sup> | 1                 |

ns, (\*), (\*\*) are non-significant or significant at  $P < 0.05$  or  $P < 0.01$ , respectively.
